# Supplementary material for: 1q/19p co-polysomy predicts longer survival in patients with astrocytic gliomas
Source: PubMed Central journal article supplement (PMC5620159; doi:10.18632/oncotarget.17947), 2017-05-16
Supplement: oncotarget-08-67104-s001.pdf [file oncotarget-08-67104-s001.pdf]

# 1q/19p co-polysomy predicts longer survival in patients with astrocytic gliomas

## SUPPLEMENTARY MATERIALS

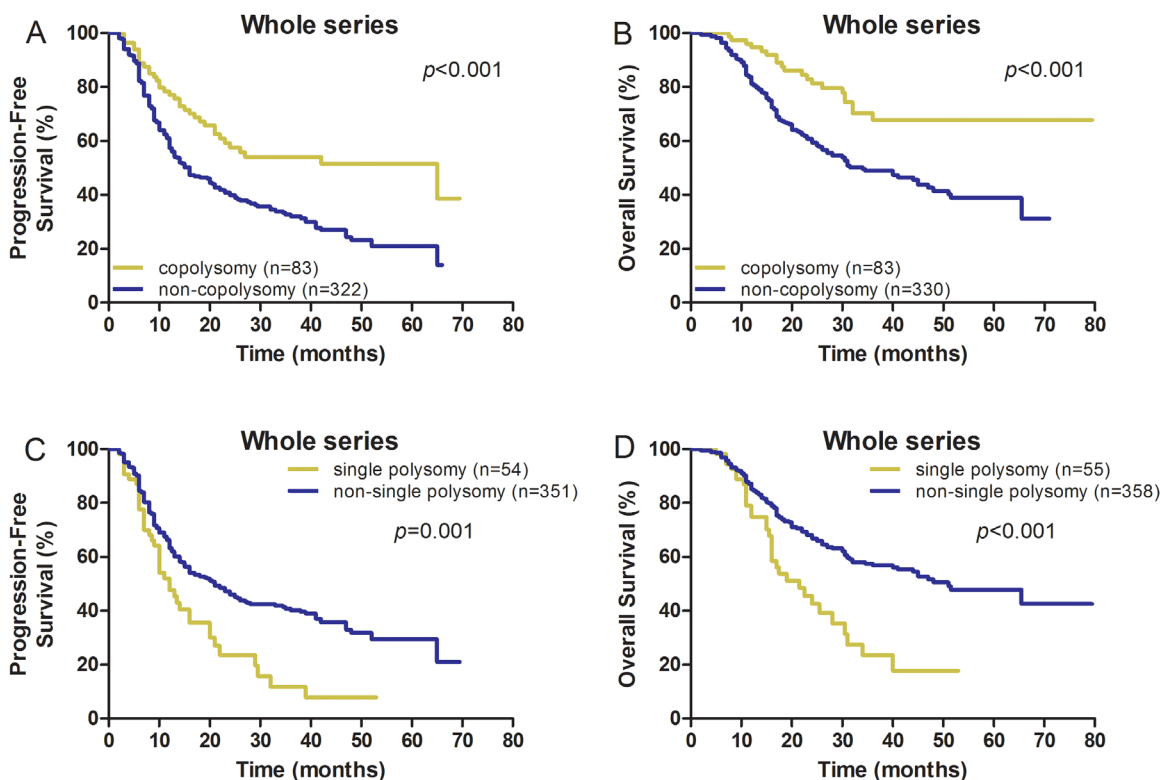

**Supplementary Figure 1:** Patients with 1q/19p co-polysomy had longer survival than those without co-polysomy (A for PFS and B for OS). Patients with the 1q/19p single polysomy had shorter survival than did those without single polysomy (C for PFS and D for OS).

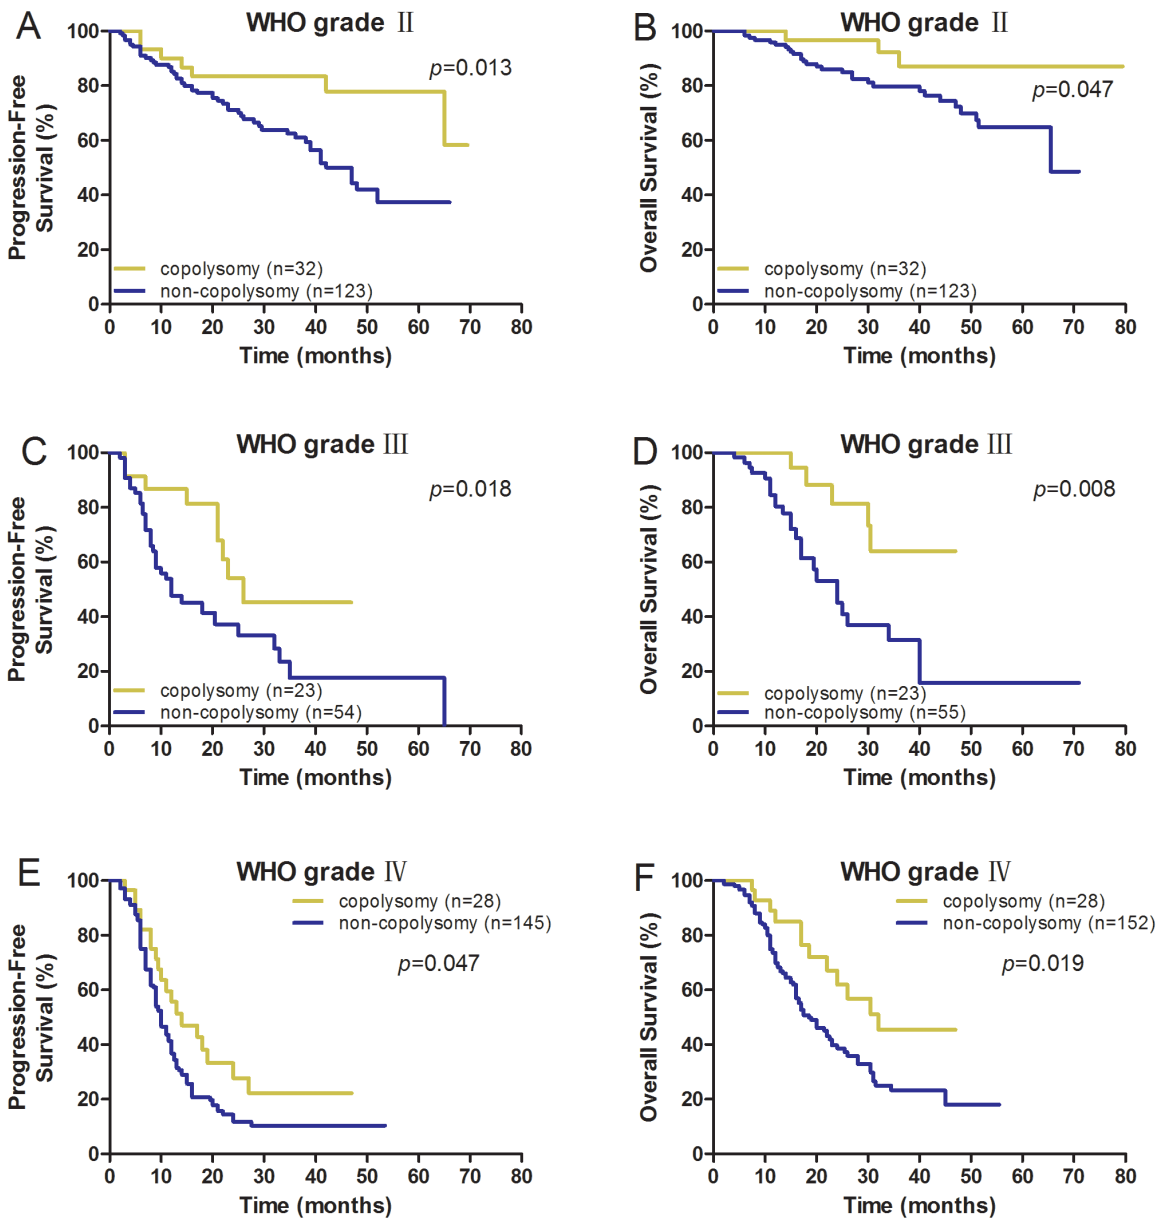

**Supplementary Figure 2:** 1q/19p co-polysomy predicted longer survival in grade II (A for PFS and B for OS), grade III (C for PFS and D for OS), and grade IV gliomas (E for PFS and F for OS).

**Supplementary Table 1: Pathological classification in the WHO<sub>2016</sub> classified cohort (n=572)**

| <b>Classification</b>                | <b>Number</b> |
|--------------------------------------|---------------|
| Diffuse astrocytoma, IDH-mutant      | 158           |
| Diffuse astrocytoma, IDH-wildtype    | 79            |
| Anaplastic astrocytoma, IDH-mutant   | 70            |
| Anaplastic astrocytoma, IDH-wildtype | 66            |
| Glioblastoma, IDH-mutant             | 40            |
| Glioblastoma, IDH-wildtype           | 159           |
